# Supplementary material
Source: MDPI journal article supplement (https://www.mdpi.com/2077-1312/11/2/403)
Supplement: s1 [file s1]

**Table S1.** Environmental parameters recorded at study area, Patong Bay, Phuket, Thailand during April - October 2021

| Parameter                                                       | Min   | 1 <sup>st</sup> quartile | Median | Mean   | 3 <sup>rd</sup> quartile | Max      |
|-----------------------------------------------------------------|-------|--------------------------|--------|--------|--------------------------|----------|
| Dissolved oxygen (mgL <sup>-1</sup> )                           | 3.36  | 6.13                     | 6.50   | 6.38   | 6.76                     | 6.99     |
| Temperature (°C)                                                | 27.86 | 29.32                    | 29.52  | 29.55  | 29.78                    | 30.68    |
| Salinity (ppt)                                                  | 26.49 | 32.78                    | 32.81  | 32.81  | 32.87                    | 34.06    |
| pH                                                              | 7.65  | 8.17                     | 8.18   | 8.18   | 8.20                     | 8.22     |
| Light intensity (μmol photons m <sup>-2</sup> s <sup>-1</sup> ) | 23.15 | 101.45                   | 143.34 | 181.12 | 205.46                   | 1,405.54 |

**Table S2.** Water quality parameters in the treatment tanks measured during experiment. Data are shown as Mean  $\pm$  SE

| Treatment             | Day | Temperature (°C) | DO (mgL <sup>-1</sup> ) | pH               | Salinity (ppt) | Nitrate: NO <sub>3</sub> <sup>-</sup> (mg-N L <sup>-1</sup> ) | Ammonia: NH <sub>3</sub> (mg-N L <sup>-1</sup> ) |
|-----------------------|-----|------------------|-------------------------|------------------|----------------|---------------------------------------------------------------|--------------------------------------------------|
| Ambient               | 1   | 29               | 6.37 $\pm$ 0.013        | 8.30 $\pm$ 0.003 | 31.5           |                                                               |                                                  |
|                       | 2   | 29               | 6.37 $\pm$ 0.018        | 8.32 $\pm$ 0.006 | 32             |                                                               |                                                  |
|                       | 3   | 29               | 6.27 $\pm$ 0.060        | 8.30 $\pm$ 0.006 | 32             | 2 $\pm$ 0                                                     | 0.22 $\pm$ 0.033                                 |
|                       | 4   | 29               | 6.14 $\pm$ 0.023        | 8.27 $\pm$ 0.015 | 32             |                                                               |                                                  |
|                       | 5   | 29               | 6.20 $\pm$ 0.046        | 8.35 $\pm$ 0.009 | 32             |                                                               |                                                  |
|                       | 6   | 29               | 6.17 $\pm$ 0.036        | 8.36 $\pm$ 0.003 | 32             | 2 $\pm$ 0                                                     | 0.22 $\pm$ 0.033                                 |
|                       | 7   | 29               | 6.17 $\pm$ 0.025        | 8.35 $\pm$ 0.012 | 32             |                                                               |                                                  |
|                       | 8   | 29               | 6.21 $\pm$ 0.024        | 8.44 $\pm$ 0.006 | 32             |                                                               |                                                  |
|                       | 9   | 29               | 6.17 $\pm$ 0.036        | 8.16 $\pm$ 0.003 | 32             | 4 $\pm$ 1                                                     | 0.15 $\pm$ 0.000                                 |
| Heat stress           | 1   | 32               | 6.39 $\pm$ 0.018        | 8.25 $\pm$ 0.020 | 32             |                                                               |                                                  |
|                       | 2   | 32               | 6.27 $\pm$ 0.044        | 8.27 $\pm$ 0.003 | 32             |                                                               |                                                  |
|                       | 3   | 32               | 6.22 $\pm$ 0.069        | 8.24 $\pm$ 0.015 | 32             | 2 $\pm$ 0                                                     | 0.18 $\pm$ 0.033                                 |
|                       | 4   | 32               | 6.08 $\pm$ 0.023        | 8.24 $\pm$ 0.003 | 32             |                                                               |                                                  |
|                       | 5   | 32               | 6.15 $\pm$ 0.035        | 8.34 $\pm$ 0.020 | 32             |                                                               |                                                  |
|                       | 6   | 32               | 6.13 $\pm$ 0.035        | 8.33 $\pm$ 0.009 | 32             | 3 $\pm$ 1                                                     | 0.22 $\pm$ 0.033                                 |
|                       | 7   | 32               | 6.13 $\pm$ 0.024        | 8.30 $\pm$ 0.006 | 32             |                                                               |                                                  |
|                       | 8   | 32               | 6.16 $\pm$ 0.020        | 8.38 $\pm$ 0.015 | 32             |                                                               |                                                  |
|                       | 9   | 32               | 6.11 $\pm$ 0.037        | 8.17 $\pm$ 0.003 | 32             | 5 $\pm$ 0                                                     | 0.15 $\pm$ 0.000                                 |
| Hypoxia               | 1   | 29               | 1.97 $\pm$ 0.006        | 8.24 $\pm$ 0.009 | 32             |                                                               |                                                  |
|                       | 2   | 29               | 1.84 $\pm$ 0.038        | 8.45 $\pm$ 0.012 | 32             |                                                               |                                                  |
|                       | 3   | 29               | 1.92 $\pm$ 0.035        | 8.45 $\pm$ 0.006 | 32             | 3 $\pm$ 1                                                     | 0.15 $\pm$ 0.000                                 |
|                       | 4   | 29               | 1.90 $\pm$ 0.050        | 8.45 $\pm$ 0.003 | 32             |                                                               |                                                  |
|                       | 5   | 29               | 1.97 $\pm$ 0.007        | 8.50 $\pm$ 0.026 | 32             |                                                               |                                                  |
|                       | 6   | 29               | 1.98 $\pm$ 0.012        | 8.49 $\pm$ 0.020 | 32             | 5 $\pm$ 0                                                     | 0.17 $\pm$ 0.083                                 |
|                       | 7   | 29               | 1.86 $\pm$ 0.064        | 8.47 $\pm$ 0.003 | 32             |                                                               |                                                  |
|                       | 8   | 29               | 1.89 $\pm$ 0.052        | 8.54 $\pm$ 0.003 | 32             |                                                               |                                                  |
|                       | 9   | 29               | 1.87 $\pm$ 0.018        | 8.38 $\pm$ 0.026 | 32             | 5 $\pm$ 0                                                     | 0.15 $\pm$ 0.000                                 |
| Heat stress + hypoxia | 1   | 32               | 1.97 $\pm$ 0.017        | 8.25 $\pm$ 0.012 | 32             |                                                               |                                                  |
|                       | 2   | 32               | 1.85 $\pm$ 0.015        | 8.48 $\pm$ 0.006 | 32             |                                                               |                                                  |
|                       | 3   | 32               | 1.86 $\pm$ 0.009        | 8.54 $\pm$ 0.015 | 32             | 3 $\pm$ 1                                                     | 0.22 $\pm$ 0.033                                 |
|                       | 4   | 32               | 1.94 $\pm$ 0.039        | 8.55 $\pm$ 0.003 | 32             |                                                               |                                                  |
|                       | 5   | 32               | 1.99 $\pm$ 0.009        | 8.58 $\pm$ 0.026 | 32             |                                                               |                                                  |
|                       | 6   | 32               | 1.94 $\pm$ 0.034        | 8.50 $\pm$ 0.017 | 32             | 3 $\pm$ 1                                                     | 0.22 $\pm$ 0.033                                 |
|                       | 7   | 32               | 1.92 $\pm$ 0.043        | 8.55 $\pm$ 0.015 | 32             |                                                               |                                                  |
|                       | 8   | 32               | 1.92 $\pm$ 0.038        | 8.67 $\pm$ 0.003 | 32             |                                                               |                                                  |
|                       | 9   | 32               | 1.94 $\pm$ 0.032        | 8.46 $\pm$ 0.015 | 32             | 4 $\pm$ 1                                                     | 0.15 $\pm$ 0.000                                 |

Note: The SE of temperature and salinity was zero

**Table S3.** Summary of different ANOVAs for photosynthesis, *Symbiodiniaceae* density, chlorophyll content and growth rate of *P. lutea*. Significant values ( $p < 0.05$ ) are shown in bold.

| <i>P. lutea</i>         |    |                                                           |                                                            |                                                           |                                                            |                                   |               |                           |                |
|-------------------------|----|-----------------------------------------------------------|------------------------------------------------------------|-----------------------------------------------------------|------------------------------------------------------------|-----------------------------------|---------------|---------------------------|----------------|
| Factor or interaction   |    | F <sub>v</sub> /F <sub>m</sub><br>after dark<br>condition | F <sub>v</sub> /F <sub>m</sub><br>after light<br>condition | F <sub>v</sub> /F <sub>0</sub><br>after dark<br>condition | F <sub>v</sub> /F <sub>0</sub><br>after light<br>condition | <i>Symbiodiniaceae</i><br>density | Chl <i>a</i>  | Chl <i>c</i> <sub>2</sub> | Growth<br>rate |
| Time                    | df | 9                                                         | 8                                                          | 9                                                         | 8                                                          | 3                                 | 3             | 3                         |                |
|                         | F  | 5.674                                                     | 7.506                                                      | 6.403                                                     | 7.960                                                      | 3.075                             | 2.696         | 2.427                     |                |
|                         | p  | <b>&lt;0.001*</b>                                         | <b>&lt;0.001*</b>                                          | <b>&lt;0.001*</b>                                         | <b>&lt;0.001*</b>                                          | <b>0.036*</b>                     | 0.056         | 0.077                     |                |
| Temperature             | df | 1                                                         | 1                                                          | 1                                                         | 1                                                          | 1                                 | 1             | 1                         | 1              |
|                         | F  | 6.814                                                     | 7.917                                                      | 8.327                                                     | 9.315                                                      | 14.012                            | 0.982         | 6.502                     | 0.273          |
|                         | p  | <b>0.010*</b>                                             | <b>0.006*</b>                                              | <b>0.005*</b>                                             | <b>0.003*</b>                                              | <b>&lt;0.001*</b>                 | 0.327         | <b>0.014*</b>             | 0.611          |
| DO                      | df | 1                                                         | 1                                                          | 1                                                         | 1                                                          | 1                                 | 1             | 1                         | 1              |
|                         | F  | 14.720                                                    | 8.190                                                      | 15.723                                                    | 8.903                                                      | 6.395                             | 1.571         | 0.685                     | 1.260          |
|                         | p  | <b>&lt;0.001*</b>                                         | <b>0.005*</b>                                              | <b>&lt;0.001*</b>                                         | <b>0.004*</b>                                              | <b>0.015*</b>                     | 0.216         | 0.412                     | 0.284          |
| Time x temperature      | df | 9                                                         | 8                                                          | 9                                                         | 8                                                          | 3                                 | 3             | 3                         |                |
|                         | F  | 1.153                                                     | 3.193                                                      | 1.227                                                     | 3.269                                                      | 2.756                             | 0.615         | 0.866                     |                |
|                         | p  | 0.331                                                     | <b>0.003*</b>                                              | 0.285                                                     | <b>0.002*</b>                                              | 0.052                             | 0.609         | 0.465                     |                |
| Time x DO               | df | 9                                                         | 8                                                          | 9                                                         | 8                                                          | 3                                 | 3             | 3                         |                |
|                         | F  | 0.841                                                     | 2.456                                                      | 0.925                                                     | 2.692                                                      | 0.691                             | 2.421         | 0.628                     |                |
|                         | p  | 0.579                                                     | <b>0.018*</b>                                              | 0.506                                                     | <b>0.010*</b>                                              | 0.562                             | 0.077         | 0.601                     |                |
| Temperature x DO        | df | 1                                                         | 1                                                          | 1                                                         | 1                                                          | 1                                 | 1             | 1                         | 1              |
|                         | F  | 1.572                                                     | 9.755                                                      | 0.940                                                     | 8.136                                                      | 0.213                             | 0.002         | 0.532                     | 0.196          |
|                         | p  | 0.212                                                     | <b>0.002*</b>                                              | 0.334                                                     | <b>0.005*</b>                                              | 0.647                             | 0.964         | 0.469                     | 0.666          |
| Time x temperature x DO | df | 9                                                         | 8                                                          | 9                                                         | 8                                                          | 3                                 | 3             | 3                         |                |
|                         | F  | 0.976                                                     | 2.579                                                      | 1.018                                                     | 3.110                                                      | 3.452                             | 2.852         | 0.526                     |                |
|                         | p  | 0.463                                                     | <b>0.013*</b>                                              | 0.429                                                     | <b>0.003*</b>                                              | <b>0.024*</b>                     | <b>0.047*</b> | 0.667                     |                |

**Table S4.** Summary of different ANOVAs for photosynthesis, *Symbiodiniaceae* density, chlorophyll content and growth rate of *M. tuberculosa*. Significant values ( $p < 0.05$ ) are shown in bold.

| <i>M. tuberculosa</i>   |    |                                      |                                       |                                      |                                       |                                   |                   |                           |                   |
|-------------------------|----|--------------------------------------|---------------------------------------|--------------------------------------|---------------------------------------|-----------------------------------|-------------------|---------------------------|-------------------|
| Factor or interaction   |    | $F_v/F_m$<br>after dark<br>condition | $F_v/F_m$<br>after light<br>condition | $F_v/F_0$<br>after dark<br>condition | $F_v/F_0$<br>after light<br>condition | <i>Symbiodiniaceae</i><br>density | Chl <i>a</i>      | Chl <i>c</i> <sub>2</sub> | Growth<br>rate    |
|                         | df | 9                                    | 8                                     | 9                                    | 8                                     | 3                                 | 3                 | 3                         |                   |
| Time                    | F  | 3.872                                | 2.424                                 | 3.861                                | 2.238                                 | 13.467                            | 9.593             | 36.852                    |                   |
|                         | p  | <b>&lt;0.001*</b>                    | <b>0.019*</b>                         | <b>&lt;0.001*</b>                    | <b>0.03*</b>                          | <b>&lt;0.001*</b>                 | <b>&lt;0.001*</b> | <b>&lt;0.001*</b>         |                   |
|                         | df | 1                                    | 1                                     | 1                                    | 1                                     | 1                                 | 1                 | 1                         | 1                 |
| Temperature             | F  | 12.895                               | 7.323                                 | 13.936                               | 8.832                                 | 0.373                             | 4.395             | 0.271                     | 19.825            |
|                         | p  | <b>&lt;0.001*</b>                    | <b>0.008*</b>                         | <b>&lt;0.001*</b>                    | <b>0.004*</b>                         | 0.544                             | <b>0.041*</b>     | 0.605                     | <b>&lt;0.001*</b> |
|                         | df | 1                                    | 1                                     | 1                                    | 1                                     | 1                                 | 1                 | 1                         | 1                 |
| DO                      | F  | 12.578                               | 17.652                                | 12.545                               | 17.472                                | 0.880                             | 1.983             | 2.316                     | 0.007             |
|                         | p  | <b>&lt;0.001*</b>                    | <b>&lt;0.001*</b>                     | <b>&lt;0.001*</b>                    | <b>&lt;0.001*</b>                     | 0.353                             | 0.166             | 0.135                     | 0.936             |
|                         | df | 9                                    | 8                                     | 9                                    | 8                                     | 3                                 | 3                 | 3                         |                   |
| Time x temperature      | F  | 0.532                                | 0.205                                 | 0.651                                | 0.155                                 | 0.438                             | 0.594             | 2.239                     |                   |
|                         | p  | 0.849                                | 0.989                                 | 0.751                                | 0.996                                 | 0.726                             | 0.622             | 0.096                     |                   |
|                         | df | 9                                    | 8                                     | 9                                    | 8                                     | 3                                 | 3                 | 3                         |                   |
| Time x DO               | F  | 0.464                                | 0.670                                 | 0.447                                | 0.654                                 | 0.827                             | 1.140             | 3.085                     |                   |
|                         | p  | 0.896                                | 0.717                                 | 0.907                                | 0.731                                 | 0.486                             | 0.343             | <b>0.036*</b>             |                   |
|                         | df | 1                                    | 1                                     | 1                                    | 1                                     | 1                                 | 1                 | 1                         | 1                 |
| Temperature x DO        | F  | 0.041                                | 2.405                                 | 0.045                                | 2.092                                 | 4.975                             | 0.022             | 3.495                     | 0.623             |
|                         | p  | 0.840                                | 0.124                                 | 0.832                                | 0.151                                 | <b>0.030*</b>                     | 0.883             | 0.068                     | 0.445             |
|                         | df | 9                                    | 8                                     | 9                                    | 8                                     | 3                                 | 3                 | 3                         |                   |
| Time x temperature x DO | F  | 0.308                                | 0.158                                 | 0.304                                | 0.223                                 | 0.968                             | 1.733             | 2.818                     |                   |
|                         | p  | 0.971                                | 0.996                                 | 0.972                                | 0.986                                 | 0.416                             | 0.173             | <b>0.049*</b>             |                   |

**Table S5.** Summary of different ANOVAs for photosynthesis, *Symbiodiniaceae* density, chlorophyll content and growth rate of *P. verrucosa*. Significant values ( $p < 0.05$ ) are shown in bold.

| <i>P. verrucosa</i>     |    |                                                           |                                                            |                                                           |                                                            |                                   |                   |                           |                |
|-------------------------|----|-----------------------------------------------------------|------------------------------------------------------------|-----------------------------------------------------------|------------------------------------------------------------|-----------------------------------|-------------------|---------------------------|----------------|
| Factor or interaction   |    | F <sub>v</sub> /F <sub>m</sub><br>after dark<br>condition | F <sub>v</sub> /F <sub>m</sub><br>after light<br>condition | F <sub>v</sub> /F <sub>0</sub><br>after dark<br>condition | F <sub>v</sub> /F <sub>0</sub><br>after light<br>condition | <i>Symbiodiniaceae</i><br>density | Chl <i>a</i>      | Chl <i>c</i> <sub>2</sub> | Growth<br>rate |
| Time                    | df | 9                                                         | 8                                                          | 9                                                         | 8                                                          | 3                                 | 3                 | 3                         |                |
|                         | F  | 2.873                                                     | 2.620                                                      | 7.077                                                     | 1.726                                                      | 2.060                             | 0.853             | 0.900                     |                |
|                         | p  | <b>0.004*</b>                                             | <b>0.012*</b>                                              | <b>&lt;0.001*</b>                                         | 0.100                                                      | 0.118                             | 0.472             | 0.448                     |                |
| Temperature             | df | 1                                                         | 1                                                          | 1                                                         | 1                                                          | 1                                 | 1                 | 1                         | 1              |
|                         | F  | 19.782                                                    | 17.202                                                     | 54.731                                                    | 15.946                                                     | 16.810                            | 2.463             | 2.874                     | 3.232          |
|                         | p  | <b>&lt;0.001*</b>                                         | <b>&lt;0.001*</b>                                          | <b>&lt;0.001*</b>                                         | <b>&lt;0.001*</b>                                          | <b>&lt;0.001*</b>                 | 0.123             | 0.096                     | 0.097          |
| DO                      | df | 1                                                         | 1                                                          | 1                                                         | 1                                                          | 1                                 | 1                 | 1                         | 1              |
|                         | F  | 2.437                                                     | 1.010                                                      | 6.482                                                     | 7.720                                                      | 7.134                             | 0.001             | 0.132                     | 3.319          |
|                         | p  | 0.121                                                     | 0.317                                                      | <b>0.012*</b>                                             | <b>0.006*</b>                                              | <b>0.010*</b>                     | 0.982             | 0.718                     | 0.093          |
| Time x temperature      | df | 9                                                         | 8                                                          | 9                                                         | 8                                                          | 3                                 | 3                 | 3                         |                |
|                         | F  | 1.200                                                     | 0.975                                                      | 0.684                                                     | 0.404                                                      | 2.807                             | 0.648             | 0.462                     |                |
|                         | p  | 0.301                                                     | 0.460                                                      | 0.722                                                     | 0.916                                                      | <b>0.049*</b>                     | 0.588             | 0.710                     |                |
| Time x DO               | df | 9                                                         | 8                                                          | 9                                                         | 8                                                          | 3                                 | 3                 | 3                         |                |
|                         | F  | 0.445                                                     | 0.438                                                      | 1.335                                                     | 1.079                                                      | 2.186                             | 1.778             | 0.317                     |                |
|                         | p  | 0.908                                                     | 0.896                                                      | 0.226                                                     | 0.384                                                      | 0.102                             | 0.164             | 0.813                     |                |
| Temperature x DO        | df | 1                                                         | 1                                                          | 1                                                         | 1                                                          | 1                                 | 1                 | 1                         | 1              |
|                         | F  | 17.016                                                    | 14.885                                                     | 34.425                                                    | 10.299                                                     | 24.739                            | 21.413            | 26.080                    | 6.312          |
|                         | p  | <b>&lt;0.001*</b>                                         | <b>&lt;0.001*</b>                                          | <b>&lt;0.001*</b>                                         | <b>0.002*</b>                                              | <b>&lt;0.001*</b>                 | <b>&lt;0.001*</b> | <b>&lt;0.001*</b>         | <b>0.027*</b>  |
| Time x temperature x DO | df | 9                                                         | 8                                                          | 9                                                         | 8                                                          | 3                                 | 3                 | 3                         |                |
|                         | F  | 1.322                                                     | 1.282                                                      | 0.602                                                     | 0.609                                                      | 2.949                             | 9.368             | 7.344                     |                |
|                         | p  | 0.233                                                     | 0.260                                                      | 0.794                                                     | 0.768                                                      | <b>0.042*</b>                     | <b>&lt;0.001*</b> | <b>&lt;0.001*</b>         |                |

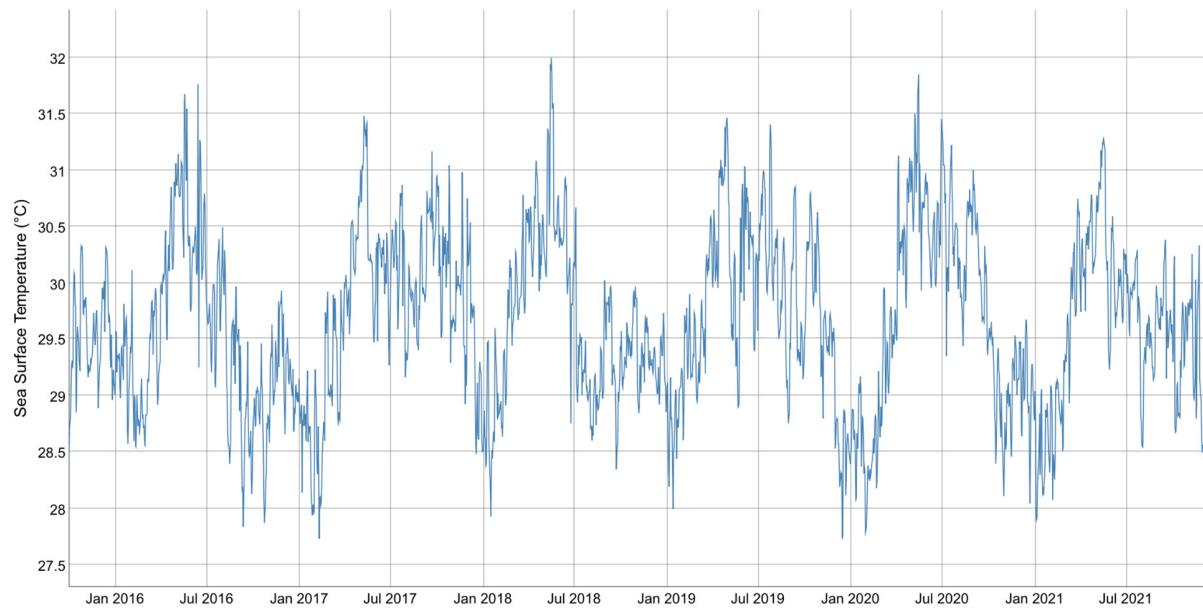

**Figure S1.** Sea surface temperature data for Patong Bay, Phuket, from 2016 - 2021. Data Source: Multi-scale Ultra-high Resolution (MUR) SST Analysis fv04.1, Global, 0.01°, 2002 - present, daily. These data were provided by JPL under support from NASA MEaSUREs program.

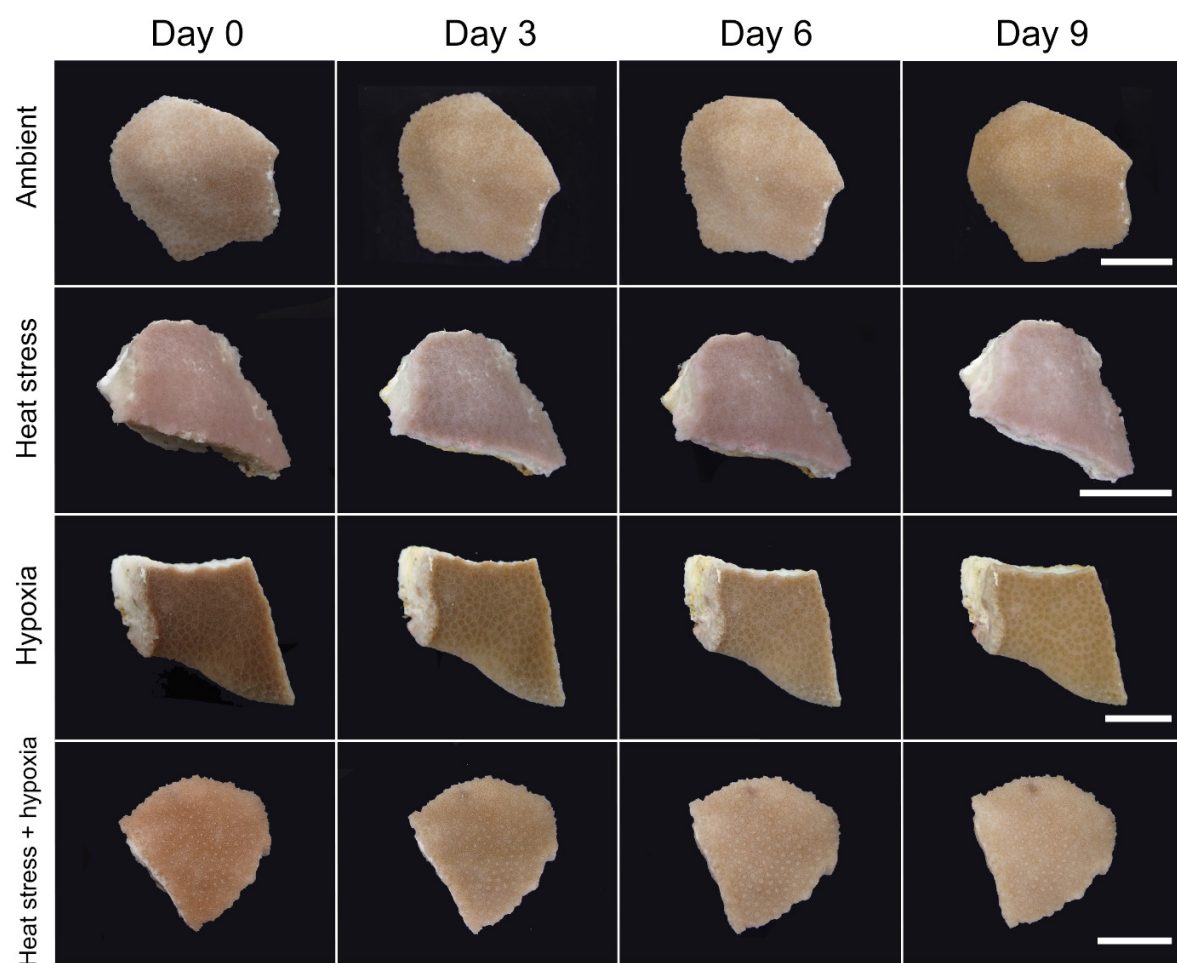

**Figure S2.** *P. lutea* samples from day 0 to day 9 under ambient, heat stress, hypoxia, and heat stress + hypoxia treatments. The white lines represent 1 cm scale bar.

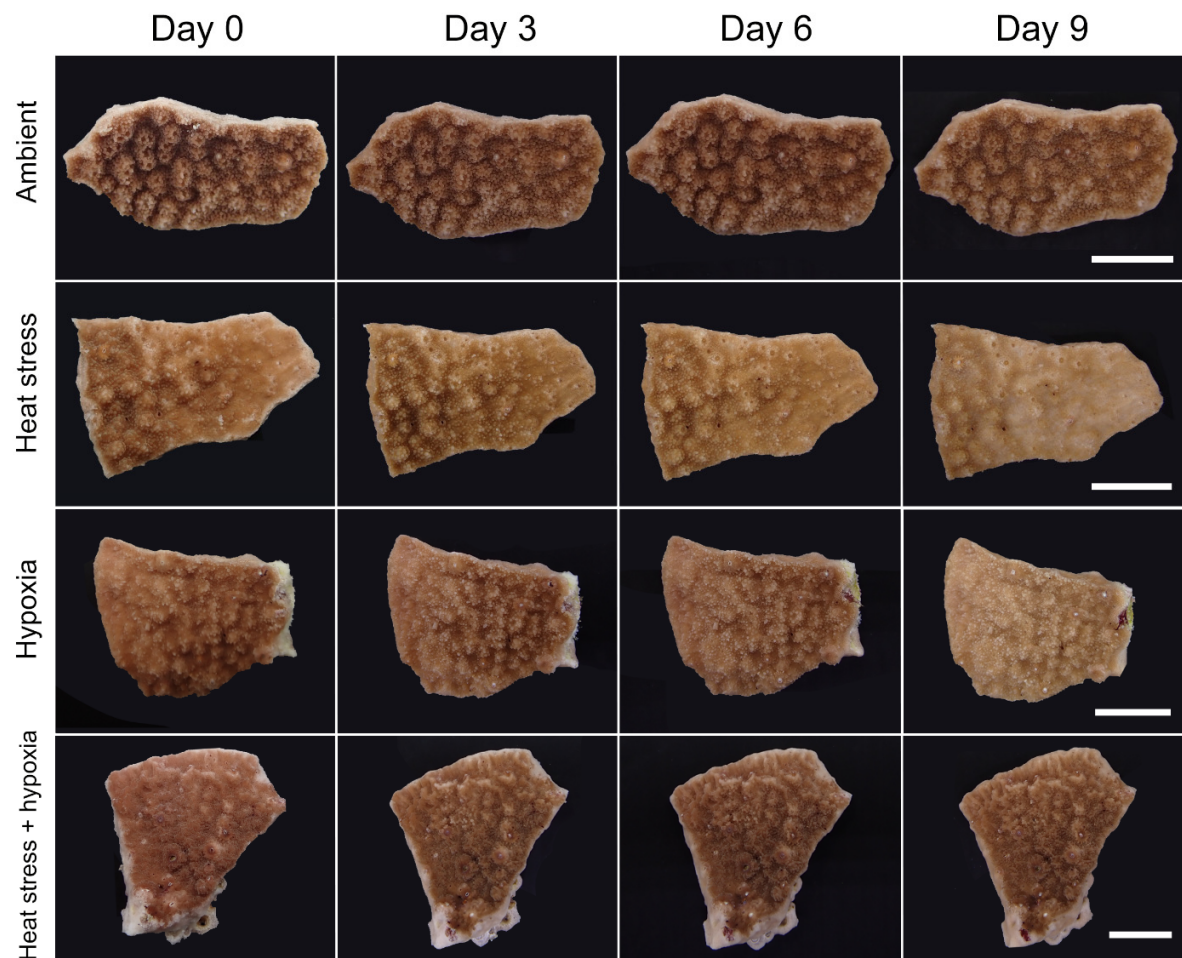

**Figure S3.** *M. tuberculosis* samples from day 0 to day 9 under ambient, heat stress, hypoxia, and heat stress + hypoxia treatments. The white lines represent 1 cm scale bar.



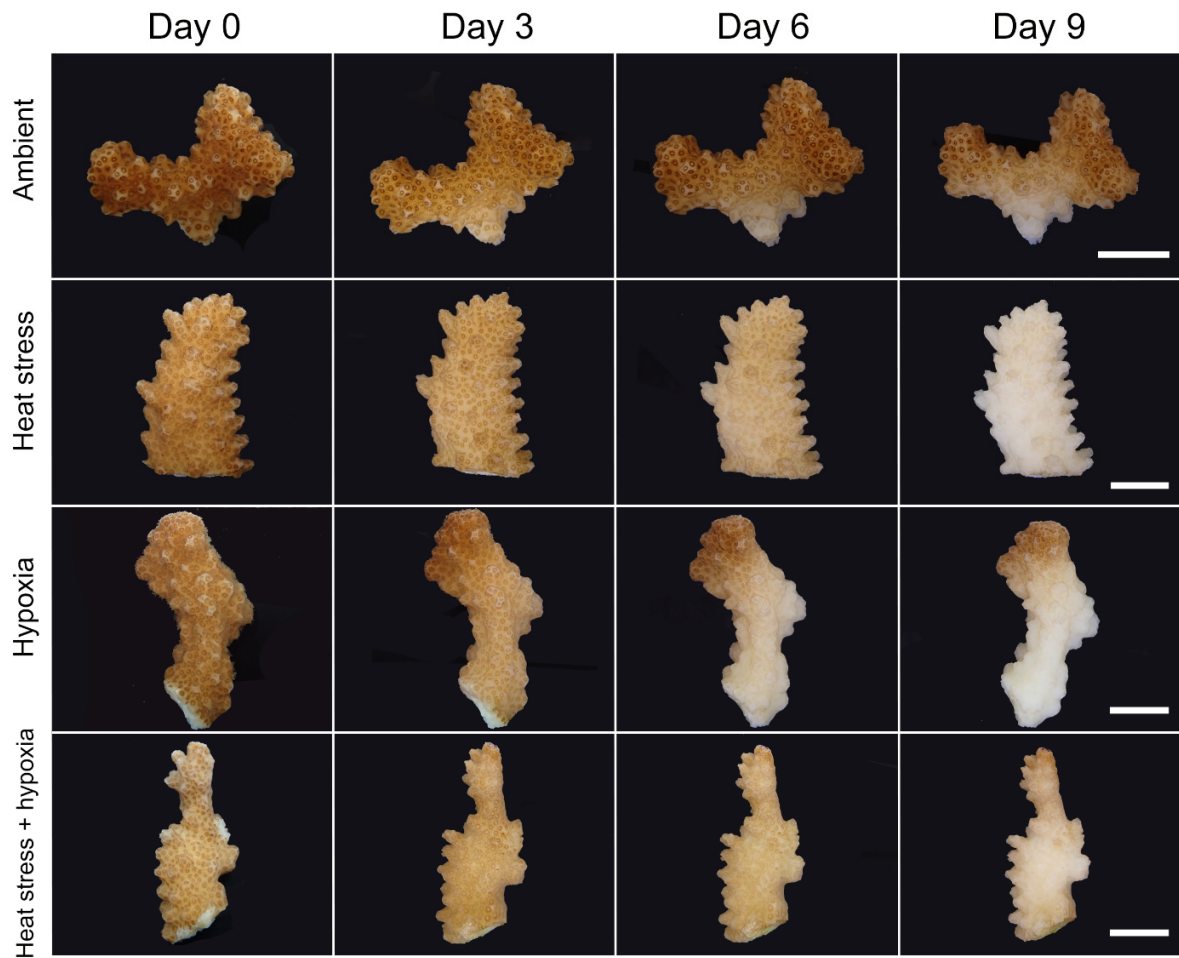

**Figure S4.** *P. verrucosa* samples from day 0 to day 9 under ambient, heat stress, hypoxia, and heat stress + hypoxia treatments. The white lines represent 1 cm scale bar.
